# Supplementary material for: Crystallization of calcium carbonate under the influences of casein and magnesium ions
Source: Royal Society of Chemistry journal article supplement (doi:10.1039/c6ra23556e), 2016-01-01
Supplement: c6ra23556e1.pdf [file c6ra23556e1.pdf]

# Crystallization of Calcium Carbonate under the Influences of Casein and Magnesium Ions

Ao Zhang, Hao Xie, Nian Liu, Bao-Li Chen, Hang Ping, Zheng-Yi Fu, Bao-Lian Su

## Supporting Information

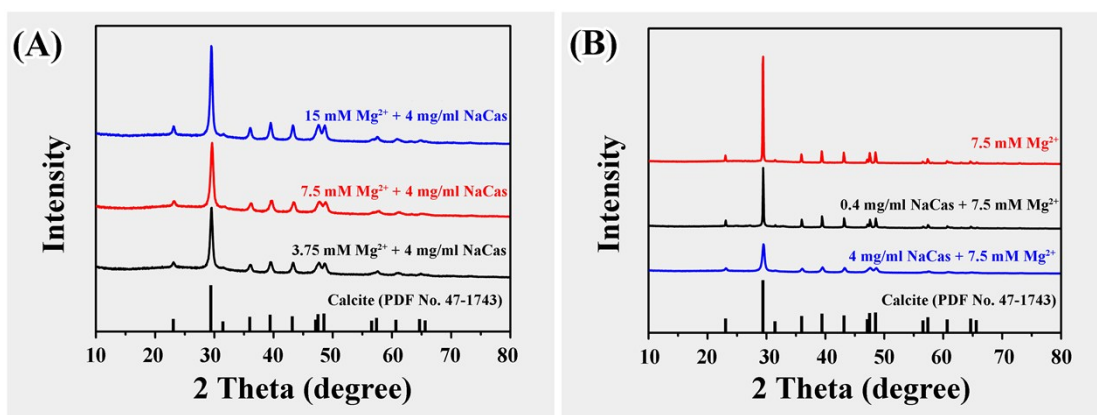

**Fig. S1 XRD spectra of CaCO<sub>3</sub> crystals obtained in the presence of casein and magnesium ions.** (A) The XRD spectra of CaCO<sub>3</sub> crystals obtained in the presence of NaCas (4 mg/ml) and various amount of magnesium ions. (B) The XRD spectra of CaCO<sub>3</sub> crystals obtained in the presence of Mg<sup>2+</sup> ions (7.5 mM) and various amount of NaCas.

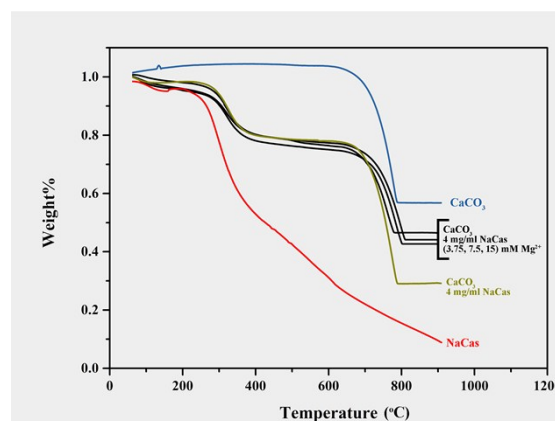

**Fig. S2 TG curves of CaCO<sub>3</sub> minerals obtained in the presence of NaCas and magnesium.**

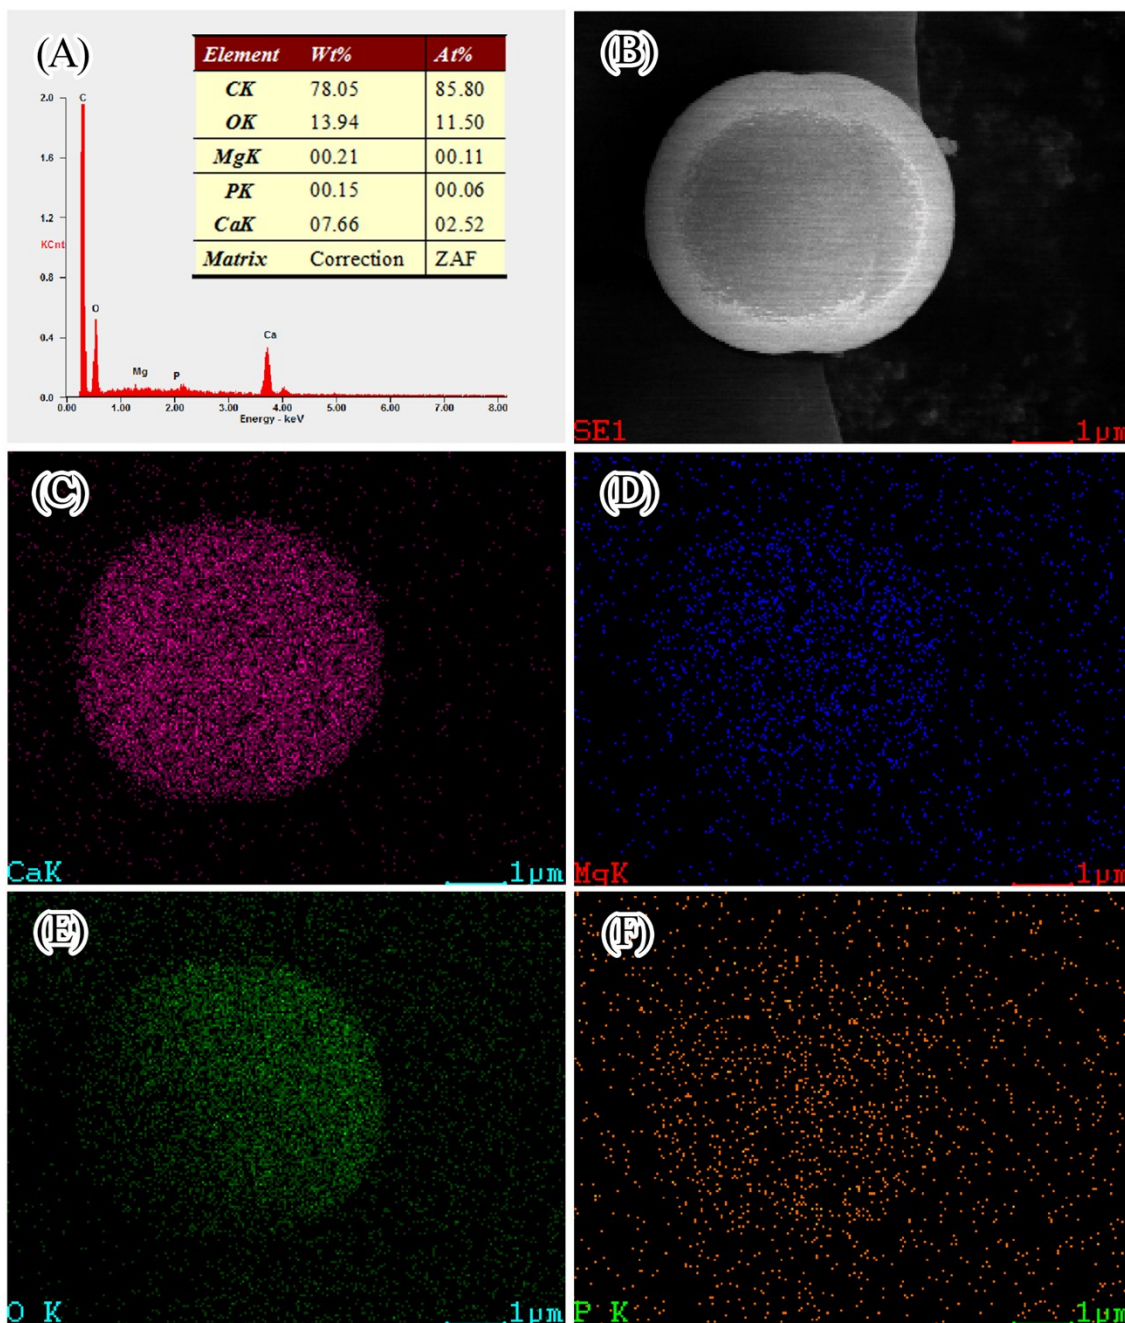

**Fig. S3 EDS analysis of  $\text{CaCO}_3$  mineralization in the presence of magnesium and casein.** Panel (A), EDS spectrum and elementary composition (inset) of  $\text{CaCO}_3$  particles formed under effects of casein and magnesium ions. Panels (B-F) show SEM image and elementary analysis of  $\text{CaCO}_3$  particles formed under effects of casein and magnesium ions. Panel (B), SEM images; Panel (C), calcium analysis; Panel (D), magnesium analysis; Panel (E), oxygen analysis; Panel (F) phosphorus analysis.
